# Supplementary material for: Rapid Enzymatic Method for Pectin Methyl Esters Determination
Source: Hindawi journal article supplement (doi:10.1155/2013/854763), 2013-01-01

## Data acquisition and control program flowchart

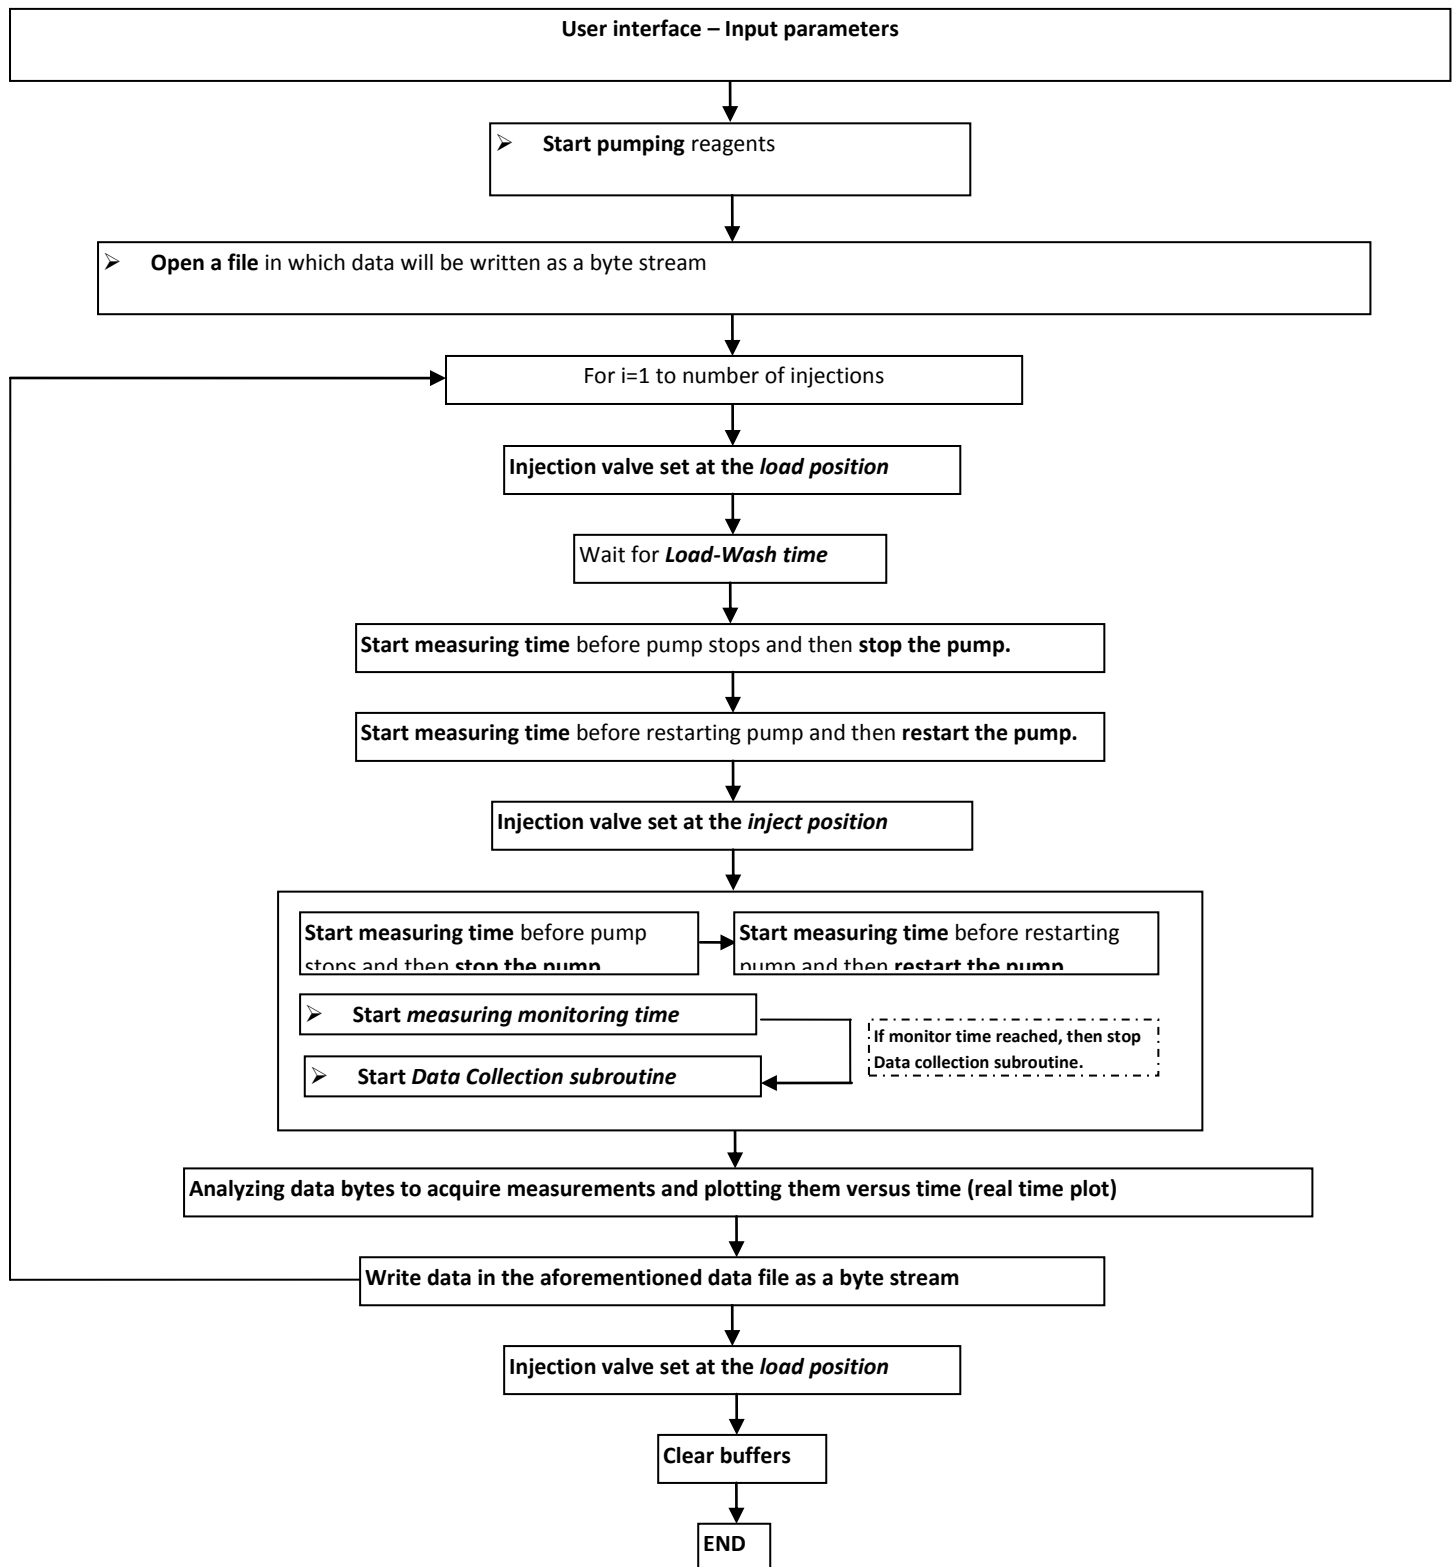

Supplement: f1 [file 854763.f1.pdf]
